# Supplementary material for: Overexpression of chalcone isomerase A gene in Astragalus trigonus for stimulating apigenin
Source: PubMed Central journal article supplement (PMC8683443; doi:10.1038/s41598-021-03704-y), 2021-12-17
Supplement: 41598_2021_3704_MOESM1_ESM.pdf [file 41598_2021_3704_MOESM1_ESM.pdf]

**Figure S1**

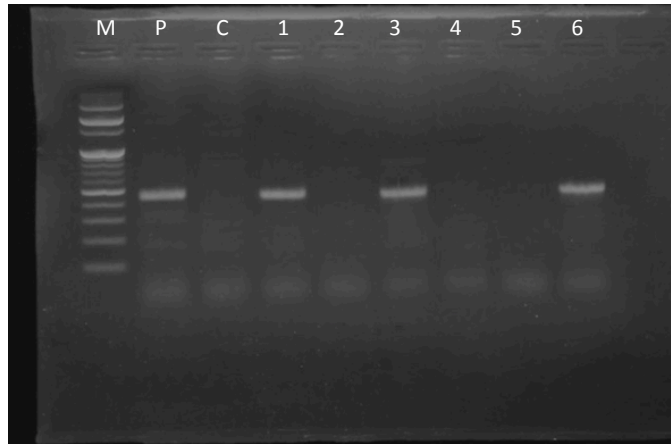

Molecular confirmation of *chiA* gene into transformed *A. trigonus* genome. PCR analysis confirming the transformation of the *chiA* gene into the plant genome. P: positive control (plasmid), C: negative control and lanes 1-6: transformed lines.

**Figure S2**

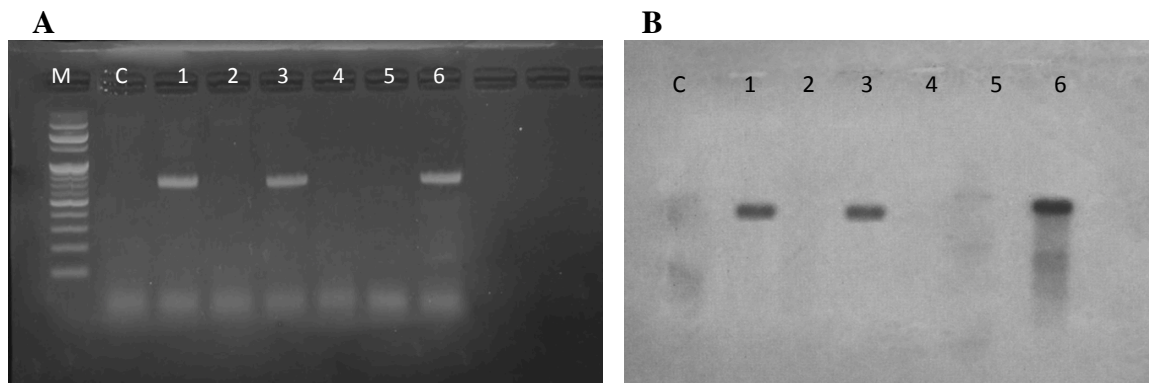

Analysis of *chiA* gene expression into transgenic *A. trigonus* plants using total RNA extracted from both the transformed lines and the control. (A) RT- PCR analysis of the *chiA* gene of transformed *A. trigonus*. M1: 100 bp DNA ladder, C: negative control; 1-6 putative transformed lines. (B) Northern blot analysis confirming the expression of the full *chiA* gene in three out of six putative transgenic lines (1-6) of *A. trigonus*. C: non-transgenic as a negative control.

**Figure S3.**

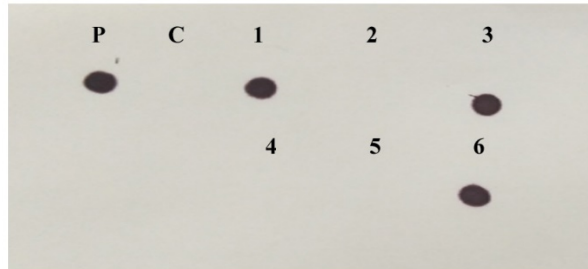

The dot plot analysis; P: positive control; C: negative control; from 1-6: six transgenic lines

**Figure S3.**

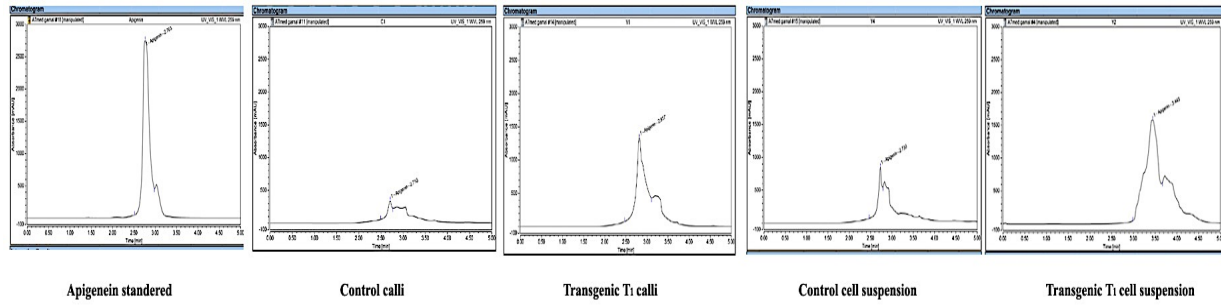

Representative HPLC chromatograms of the apigenin for the standard injection, calli and cell suspension extracts of transgenic and non transgenic *A. trigonus*
